# Supplementary material for: Discovery and characterization of 91 novel transcripts expressed in cattle placenta
Source: PubMed Central journal article supplement (PMC1884150; doi:10.1186/1471-2164-8-113), 2007-05-09

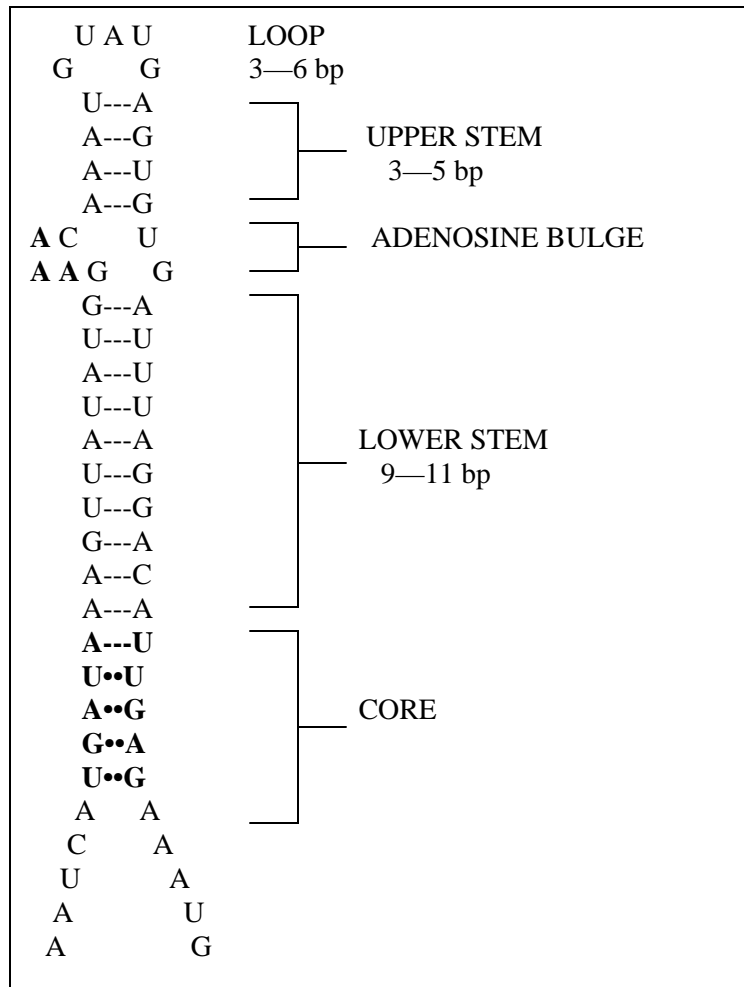

Supplement: 1471-2164-8-113-S4.pdf [file 1471-2164-8-113-S4.pdf]
